# Supplementary material
Source: publisher site journal article supplement (https://www.dovepress.com/get_supplementary_file.php?f=366239.docx)
Supplement: Supplementary file 1 [file get_supplementary_file.php]

**Questionnaire in English:**


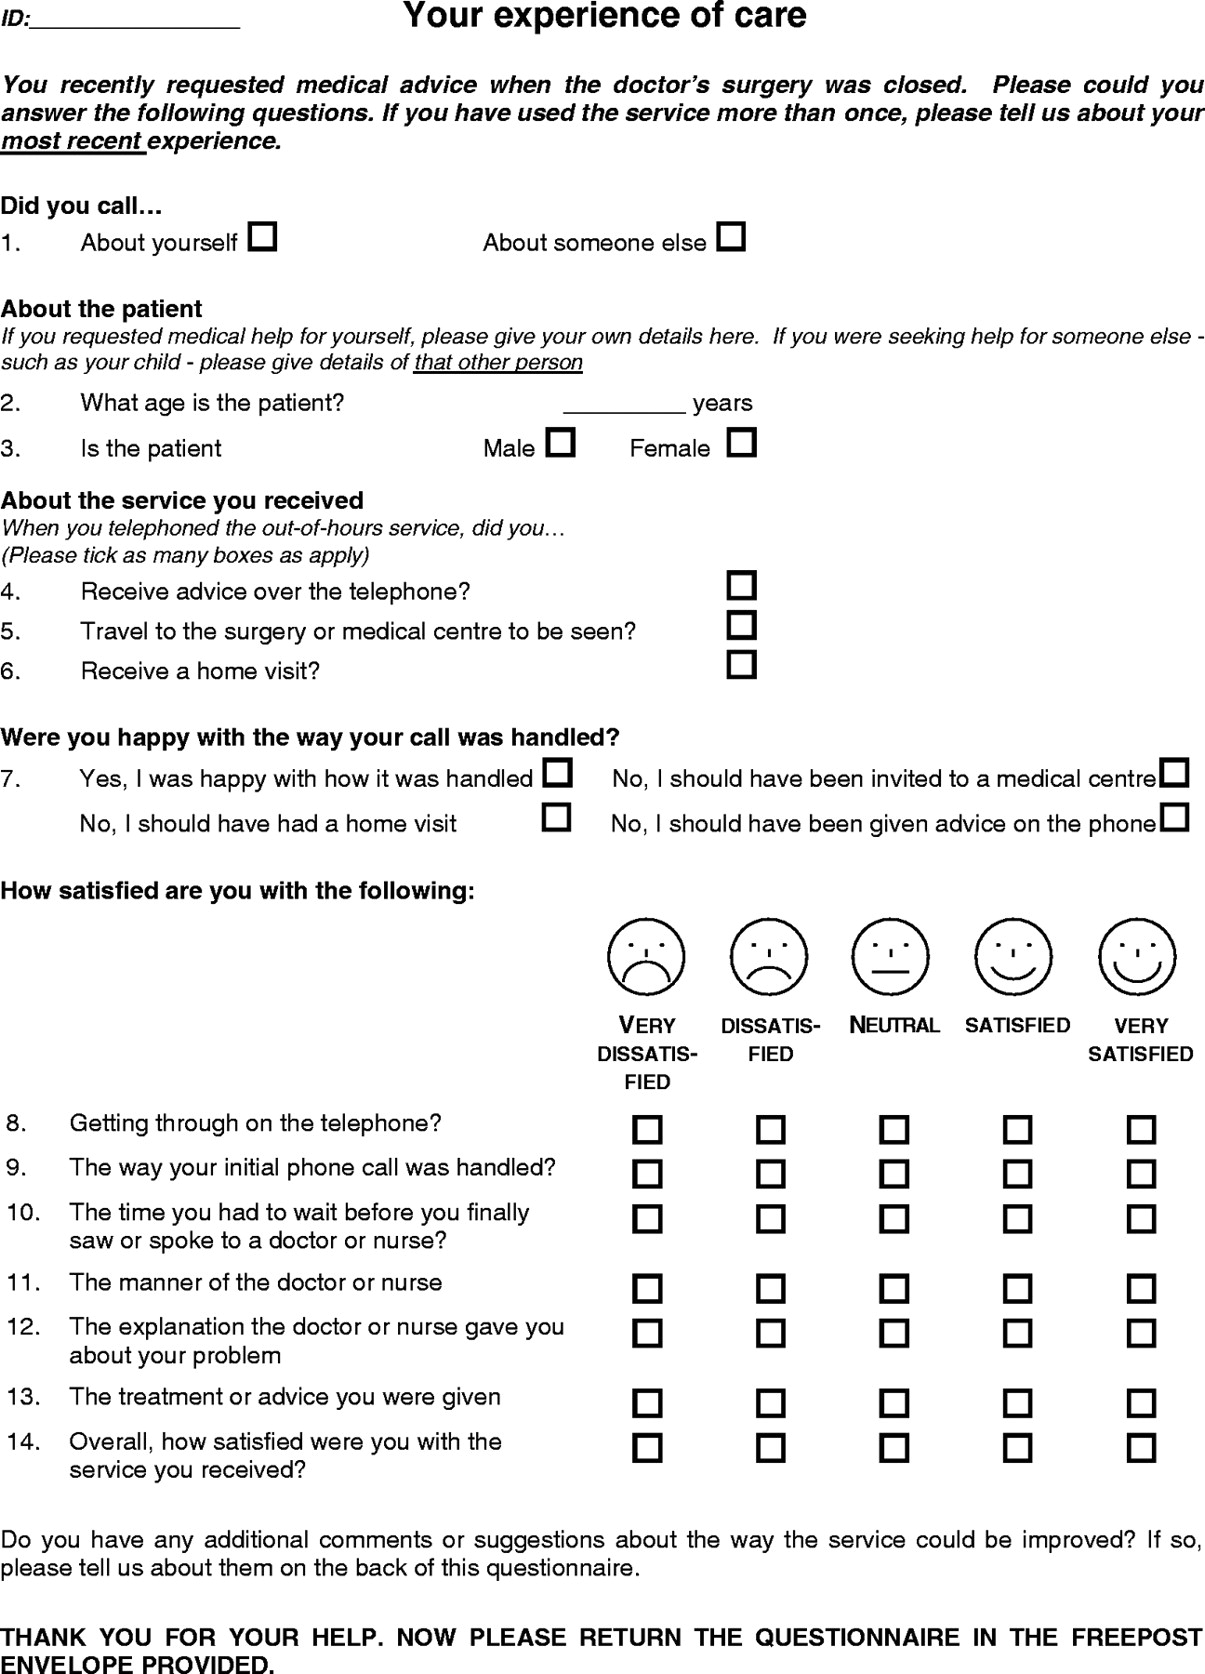


| **Questionnaire in Arabic:**  *الاستبيان الذي سيتطلب من المستفيدين من الخدمة الإجابة عليه :*  الرقم الطبي: ***_________________***  ***سبق لك تجربة الاتصال على مركز الاتصال في قسم الأسنان للحصول على الرعاية، نرجو منك الإجابة علي الأسئلة التالية :***  ***١.سبب الاتصال ..***  ***شكوى تخص شخص غيرك*** شكوى تخصك   ***اذا كانت الشكوى تخصك يرجى تزويدنا بهذه التفاصيل***    ***٢.عمر المريض ؟ ــــــــ سنة***  ***٣.هل المريض***  ***ذكر***  أنثى     *عن الخدمة المقدمة :*  ***عندما اتصلت للحصول على الخدمة ، هل ...***  ***٤. تلقيت نصيحة عبر الهاتف من مزود الخدمة؟***  ***٥. حضرت الى المركز لتلقي العلاج ؟***  ***٦. حصلت على وصفة في المنزل ؟***  ***٧. هل كنت راضي عن طريقة تلقي مكالمتك ومعالجة شكواك؟***   لا، كنت افضل القدوم للعيادةنعم كنت راضي   لا ، كنت أود الحصول على نصيحة عبر الهاتف    ***١***  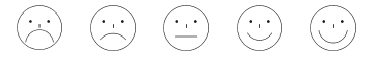**مدى رضاك عن الآتي : راضي جدا راضي محايد غير راضي غير راضي ابد**   |  |  |  |  |  | **٨. تلقي الاتصال من قبل المركز ؟** | | --- | --- | --- | --- | --- | --- | |  |  |  |  |  | **٩. طريقة التعامل المبدئ مع اتصالك ؟** | |  |  |  |  |  | **١٠. المدة التي استغرقتها ليتمكن الطبيب من الرد على اتصالك؟** | |  |  |  |  |  | **١١ طريقة تعامل الطبيب الذي تلقى اتصالك ؟** | |  |  |  |  |  | **١٢. الشرح والتوضيح الذي وفرة لك الطبيب في هذا الاتصال ؟** | |  |  |  |  |  | **١٣. الدواء الذي وصفة لك الطبيب ؟** | |  |  |  |  |  | **١٤. بشكل عام ، مدى رضاك عن الخدمة المقدمة ؟** |   اذا كان لديك تعليق إضافي او اقتراحات للمساعدة في تطوير خدمة مركز الاتصال المقدمة من قبل قسم الأسنان، نرجو تزويدنا بها ....  *شكرا لمساعدتك ..*  **Questions of the interviews with the service providers (dentists who worked in the call center from April 28, 2020, to June 30, 2020)**   - **Service performance** - **What scales were used to assess the urgency of the cases?** - **To what extent were patients capable of describing their symptoms?** - **What was your experience regarding the technical aspects of the service?** - **Essential requirements for the sustainability and improvement of the service outcomes** - **How do you see the future of teledentistry in screening patients and providing an initial diagnosis?** - **How do you find the telecommunication with the patients?** - **Would you prefer using video calls or text message for the virtual consultations? Why?** - **What do you recommend with regard to the service in general?** |
| --- | --- | --- | --- | --- | --- | --- | --- | --- | --- | --- | --- | --- | --- | --- | --- | --- | --- | --- | --- | --- | --- | --- | --- | --- | --- | --- | --- | --- | --- | --- | --- | --- | --- | --- | --- | --- | --- | --- | --- | --- | --- | --- |
